# Supplementary material
Source: HighWire-hosted journal article supplement (https://bmjopen.bmj.com/content/15/2/e094220)
Supplement: inline-supplementary-material-1 [file inline-supplementary-material-1.pdf]

Supplementary File 1

Complete list of search terms for the environmental scan of publicly available online physical activity resources for individuals with rheumatoid arthritis.

| Rheumatoid Arthritis   | Physical Activity | Additional Descriptors |
|------------------------|-------------------|------------------------|
| Rheumatoid arthritis   | Physical activity | Resource               |
| Rheumatology           | Exercise          | Handout                |
| Arthritis              | Sports            | Program                |
| Inflammatory arthritis | Movement          | Group                  |
|                        | Fitness           | Manual                 |
|                        | Exercising        | Canada                 |
|                        | Strength exercise | US                     |
|                        | Cardio exercise   | UK                     |
|                        | Exercise training | Europe                 |
|                        |                   | Australia              |
